# Supplementary material
Source: MDPI journal article supplement (https://www.mdpi.com/2073-4441/14/23/3942)
Supplement: s1 [file s1]

Supplementary Materials

# Occurrence Characteristics and Ecological Risk Assessment of Organophosphorus Compounds in a Wastewater Treatment Plant and Upstream Enterprises

Aimin Li <sup>1</sup>, Guochen Zheng <sup>2</sup>, Ning Chen <sup>1</sup>, Weiyi Xu <sup>1</sup>, Yuzhi Li <sup>1</sup>, Fei Shen <sup>3</sup>, Shuo Wang <sup>1,4,5,\*</sup>, Guangli Cao <sup>4,\*</sup> and Ji Li <sup>1,5</sup>

**Table S1.** Solid phase extraction of water samples.

| Operation               | Solvent            | Flow Rate (ml/min) | Volume (ml) | Time (min) |
|-------------------------|--------------------|--------------------|-------------|------------|
| Activation              | Methylene chloride | 2.0                | 5           | 16.87      |
| Activation              | Methanol           | 2.0                | 5           | 16.87      |
| Activation              | Water              | 2.0                | 5           | 16.87      |
| Extraction              | /                  | 2.0                | 50          | 25.33      |
| Leaching                | Water              | 1.0                | 3           | 19.60      |
| Drying                  | /                  | /                  | /           | 30.00      |
| Cleaning injection pump | Methanol           | 2.0                | 5           | 1.53       |
| Cleaning injection pump | Methylene chloride | 2.0                | 5           | 1.53       |
| Elution                 | Methylene chloride | 2.0                | 5           | 16.87      |
| Constant volume         | /                  | /                  | /           | 0.00       |
| End                     | /                  | /                  | /           | 145.47     |

**Table S2.** ECOSAR alculation results (mg/L) .

| Organophosphonic                                   | Abbreviated Name | Fish                   |          | Daphnid                |         | Green Algae            |          |
|----------------------------------------------------|------------------|------------------------|----------|------------------------|---------|------------------------|----------|
|                                                    |                  | 96-hr LC <sub>50</sub> | ChV      | 48-hr LC <sub>50</sub> | ChV     | 96-hr EC <sub>50</sub> | ChV      |
| Triphenyl phosphine                                | TEP              | 716.89                 | 277.37   | 542.27                 | 70.97   | 4041.35                | 486.44   |
| Tris-b-chloroethyl phosphate                       | TCEP             | 3.14                   | 0.01     | 0.09                   | /       | 221.77                 | 45.75    |
| Trimethyl phosphate                                | TMP              | 35194.58               | 18641.81 | 20316.16               | 1976.61 | 468296.28              | 19264.07 |
| Triphenyl phosphate                                | TPP              | 1.00                   | 0.24     | 1.13                   | 0.23    | 1.54                   | 0.94     |
| Phosphoric acid tris(2-chloro-1-methylethyl) ester | TCPP             | 1.52                   | 0.01     | 0.10                   | /       | 23.81                  | 8.70     |
| Dibutyl phosphate                                  | DBP              | 131.80                 | 45.15    | 110.70                 | 16.25   | 532.74                 | 97.20    |
| Triphenyl phosphine oxide                          | TPPO             | 92.77                  | 18.54    | 1.97                   | 0.08    | /                      | /        |
| Triphenyl phosphine sulfide                        | TPPS             | 0.65                   | 0.09     | 0.48                   | 0.10    | 1.07                   | 0.50     |
| (MethoxyMethyl) diphenylphosphine oxide            | MDPO             | 11581.51               | 1435.28  | 8.93                   | 0.54    | /                      | /        |

|                                                             |       |          |         |          |         |           |         |
|-------------------------------------------------------------|-------|----------|---------|----------|---------|-----------|---------|
| N-Dimethylaminomethyl-tert-butyl-isopropylphosphine         | NDTPI | 10.08    | 0.43    | 1.33     | 0.12    | 0.90      | 0.32    |
| Octicizer                                                   | -     | 0.06     | 0.01    | 0.08     | 0.02    | 0.05      | 0.06    |
| Dichloro[1,7,7-trimethylbicyclo[2.2.1]heptan-2-yl]phosphine | DCPP  | 0.22     | 0.03    | 0.17     | 0.04    | 0.45      | 0.23    |
| Dimethyl methane phosphonate                                | DMMP  | 16573.67 | 8260.57 | 10081.45 | 1038.84 | 186733.86 | 9457.22 |
| Diethyl methyl phosphonite                                  | DEMP  | 1657.77  | 681.63  | 1190.00  | 147.06  | 11036.67  | 1079.02 |

Note: / indicates that it was not queried in ECOSAR

**Table S3.** Concentration dependent toxic classification (mg/L) .

| Class        | The Acute Toxicity                           | The Chronic Toxicity |
|--------------|----------------------------------------------|----------------------|
| Harmless     | $LC_{50} > 100$ or $EC_{50} > 100$           | $ChV > 10$           |
| Harmful      | $10 < LC_{50} < 100$ or $10 < EC_{50} < 100$ | $1 < ChV < 10$       |
| Toxic        | $1 < LC_{50} < 10$ or $1 < EC_{50} < 10$     | $0.1 < ChV < 1$      |
| Highly toxic | $LC_{50} < 1$ or $EC_{50} < 1$               | $ChV < 0.1$          |

**Table S4.** Prediction of acute toxicity of organophosphorus components.

| Water samples                       | Organophosphonic                                             | Abbreviated Name | Toxicity                  | LC <sub>50</sub> (mg/L) |
|-------------------------------------|--------------------------------------------------------------|------------------|---------------------------|-------------------------|
| Pharmaceutical company              | Triphenyl phosphate                                          | TEP              | acute toxicity Category 3 | 67.25                   |
|                                     | Methoxy(methyldiphenyl)phosphine oxide                       | MDPO             | acute toxicity Category 3 | 45.29                   |
|                                     | Triphenyl phosphine oxide                                    | TPPO             | acute toxicity Category 2 | 4.98                    |
|                                     | Triphenyl phosphine sulfide                                  | TPPS             | acute toxicity Category 2 | 2.46                    |
| Pump station I                      | Triphenyl phosphate                                          | TEP              | acute toxicity Category 3 | 67.25                   |
|                                     | Dichloro[1,7,7-trimethylbicyclo[2.2.1]heptan-2-yl]phosphine- | DCPP             | /                         | /                       |
|                                     | Tris-b-chloroethyl phosphate                                 | TCEP             | acute toxicity Category 3 | 17.31                   |
|                                     | Triphenylphosphine oxide                                     | TPPO             | acute toxicity Category 2 | 4.98                    |
|                                     | Triphenylphosphine sulfide                                   | TPPS             | acute toxicity Category 3 | 67.25                   |
| Electronic material enterprise      | Triethyl phosphate                                           | TEP              | acute toxicity Category 3 | 67.25                   |
| Carbon black material enterprise    | Triethyl phosphate                                           | TEP              | acute toxicity Category 3 | 67.25                   |
| Tyre material enterprise            | Triethyl phosphate                                           | TEP              | acute toxicity Category 3 | 67.25                   |
| Environmental protection enterprise | Triethyl phosphate                                           | TEP              | acute toxicity Category 3 | 67.25                   |
|                                     | Triphenyl phosphate                                          | TPP              | acute toxicity Category 1 | 0.39                    |

|                              |                                                                 |       |                              |        |
|------------------------------|-----------------------------------------------------------------|-------|------------------------------|--------|
|                              | Octicizer                                                       | —     | acute toxicity<br>Category 1 | 0.0982 |
| Food<br>company              | Triphenyl phosphate                                             | TEP   | acute toxicity<br>Category 3 | 67.25  |
|                              | Tris-b-chloroethyl phosphate                                    | TCEP  | acute toxicity<br>Category 3 | 17.31  |
|                              | Trimethyl phosphate                                             | TMP   | chronic toxicity             | 133.63 |
| Pump station<br>II           | Dimethyl methane phosphonate                                    | DMMP  | /                            | /      |
|                              | Diethyl methyl phosphonite                                      | DEMP  | chronic toxicity             | 120.82 |
|                              | Dibutyl phosphate                                               | DBP   | acute toxicity<br>Category 3 | 46.10  |
|                              | Triphenyl phosphate                                             | TEP   | acute toxicity<br>Category 3 | 67.25  |
|                              | Tris-b-chloroethyl phosphate                                    | TCEP  | acute toxicity<br>Category 3 | 17.31  |
|                              | Phosphoric acid tris(2-chloro-1-methylethyl) ester              | TCPP  | acute toxicity<br>Category 2 | 7.24   |
|                              | N-Dimethylaminomethyl-tert-butyl-<br>isopropylphosphine         | NDTPI | /                            | /      |
|                              | Dimethyl methane phosphonate                                    | DMMP  | chronic toxicity             | 143.29 |
|                              | Diethyl methyl phosphonite                                      | DEMP  | acute toxicity<br>Category 3 | 42.81  |
|                              | Triphenyl phosphate                                             | TEP   | acute toxicity<br>Category 3 | 67.25  |
| Sewage<br>treatment<br>plant | Dichloro[1,7,7-trimethylbicyclo[2.2.1]heptan-2-<br>yl]phosphine | DCPP  | /                            | /      |
|                              | Tris-b-chloroethyl phosphate                                    | TCEP  | acute toxicity<br>Category 3 | 17.31  |

**Table S5.** Prediction of bioconcentration factor and developmental toxicity of organophosphorus components.

| Water Samples             | Organophosphonic                                                 | Abbreviated Name | BCF    | DevTox                         |
|---------------------------|------------------------------------------------------------------|------------------|--------|--------------------------------|
| Pharmaceutical<br>company | Triphenyl phosphate                                              | TEP              | 4.13   | developmental<br>toxicants     |
|                           | Methoxy(methyldiphenyl)phosphine oxide                           | MDPO             | 20.06  | non-developmental<br>toxicants |
|                           | Triphenylphosphine oxide                                         | TPPO             | 84.99  | non-developmental<br>toxicants |
|                           | Triphenylphosphine sulfide                                       | TPPS             | 378.27 | non-developmental<br>toxicants |
| Pump station I            | Triphenyl phosphate                                              | TEP              | 4.13   | developmental<br>toxicants     |
|                           | Dichloro[1,7,7-trimethylbicyclo[2.2.1]heptan-2-<br>yl]phosphine- | DCPP             | /      | /                              |
|                           | Tris-b-chloroethyl phosphate                                     | TCEP             | 5.01   | non-developmental<br>toxicants |
|                           | Triphenylphosphine oxide                                         | TPPO             | 84.99  | non-developmental<br>toxicants |

|                                     |                                                             |       |       |                             |
|-------------------------------------|-------------------------------------------------------------|-------|-------|-----------------------------|
|                                     | Triphenylphosphine sulfide                                  | TPPS  | 4.13  | developmental toxicants     |
| Electronic material enterprise      | Triethyl phosphate                                          | TEP   | 4.13  | developmental toxicants     |
| Carbon black material enterprise    | Triethyl phosphate                                          | TEP   | 4.13  | developmental toxicants     |
| Tyre material enterprise            | Triethyl phosphate                                          | TEP   | 4.13  | developmental toxicants     |
| Environmental protection enterprise | Triethyl phosphate                                          | TEP   | 4.13  | developmental toxicants     |
|                                     | Triphenyl phosphate                                         | TPP   | 50.67 | developmental toxicants     |
|                                     | Octicizer                                                   | —     | 48.98 | developmental toxicants     |
| Food company                        | Triphenyl phosphate                                         | TEP   | 4.13  | developmental toxicants     |
|                                     | Tris-b-chloroethyl phosphate                                | TCEP  | 5.01  | non-developmental toxicants |
| Pump station II                     | Trimethyl phosphate                                         | TMP   | 0.74  | developmental toxicants     |
|                                     | Dimethyl methane phosphonate                                | DMMP  | /     | /                           |
|                                     | Diethyl methyl phosphonite                                  | DEMP  | 2.79  | developmental toxicants     |
|                                     | Dibutyl phosphate                                           | DBP   | 5.12  | developmental toxicants     |
|                                     | Triphenyl phosphate                                         | TEP   | 4.13  | developmental toxicants     |
|                                     | Tris-b-chloroethyl phosphate                                | TCEP  | 5.01  | non-developmental toxicants |
|                                     | Phosphoric acid tris(2-chloro-1-methylethyl) ester          | TCPP  | 13.78 | developmental toxicants     |
|                                     | N-Dimethylaminomethyl-tert-butyl-isopropylphosphine         | NDTPI | /     | /                           |
|                                     | Dimethyl methane phosphonate                                | DMMP  | 1.97  | developmental toxicants     |
| Sewage treatment plant              | Diethyl methyl phosphonite                                  | DEMP  | 1.02  | developmental toxicants     |
|                                     | Triphenyl phosphate                                         | TEP   | 4.13  | developmental toxicants     |
|                                     | Dichloro[1,7,7-trimethylbicyclo[2.2.1]heptan-2-yl]phosphine | DCPP  | /     | /                           |
|                                     | Tris-b-chloroethyl phosphate                                | TCEP  | 5.01  | non-developmental toxicants |
